# Supplementary material
Source: HighWire-hosted journal article supplement (http://www.qdcxjkg.com/highwire/filestream/113749/field_highwire_adjunct_files/0/Supplemental_with_normal_font.pdf)
Supplement: Supplemental_with_normal_font.pdf [file Supplemental_with_normal_font.pdf]

**Title:** A urine biomarker for severe OSA patients: Lipocaline-type prostaglandin D synthase

Author(s): Yuichi Chihara<sup>1</sup>, M.D, PhD; Kazuo Chin<sup>2</sup>, M.D, PhD; Kosuke Aritake<sup>3</sup>, PhD; Yuka Harada<sup>1</sup>, M.D; Yoshiro Toyama<sup>1</sup>, M.D; Kimihiko Murase<sup>1</sup>, M.D; Chikara Yoshimura<sup>2</sup>, M.D, PhD; Takefumi Hitomi<sup>2</sup>, M.D, PhD; Toru Oga<sup>2</sup>, M.D, PhD; Michiaki Mishima<sup>1</sup>, M.D, PhD; Yoshihiro Urade<sup>3</sup>, PhD.

## **Supplementary material**

### **METHODS**

#### **Study subjects**

#### **Exclusion criteria**

Exclusion criteria were history of CVD; acute infection; malignancy; inflammatory, autoimmune, or other chronic diseases; diabetes mellitus (DM) under treatment with hypoglycemic agents or insulin; use of steroids, non-steroidal anti-inflammatory drugs, or immunosuppressive drugs; renal dysfunction (serum creatinine  $\geq 1.2$  mg/dl); respiratory diseases such as bronchial asthma or chronic obstructive pulmonary disease; endocrine disorders; neurological disorders; and being a current smoker. In addition, patients were excluded if they had predominantly central sleep apnoea.

#### **PSG**

The diagnosis of OSA was confirmed by PSG (SomnoStar pro, Cardinal Health, Dublin, OH, USA), which was started at 22:00 and ended at 6:00 the following morning. Surface electrodes were attached using standard techniques to obtain an electrooculogram, electromyogram of the chin, and 12-lead electroencephalograph. Sleep stages were defined according to the criteria of Rechtschaffen and Kales [S1]. Ventilation was monitored by

inductive plethysmography (Respirtrace QDC, Viasys Healthcare, Palm Springs, CA, USA).

Airflow was monitored by a nasal pressure transducer (PTAFLite, Pro-Tech Services, Inc.,

Mukilteo, WA, USA) and supplemented by an oronasal thermal sensor (Sleepmate

Technologies, Midlothian, VA, USA). Arterial oxygen saturation ( $\text{SaO}_2$ ) was monitored

continuously with a pulse oximeter (Adult Flex System, Nonin Medical, Plymouth, MN,

USA).

Apnoea was defined as the complete cessation of airflow and hypopnoea as a clear decrease in airflow of 50% or more lasting for 10 seconds or more accompanied by a decrease in percutaneous oxygen saturation ( $\text{SpO}_2$ ) of at least 3% and/or associated with arousal [S2]. All apnoea-hypopnoea index (AHI) values were expressed as the number of episodes of apnoea and hypopnoea per hour over the total sleep time. The lowest  $\text{SpO}_2$  during sleep was calculated in each patient. Arousals were scored using the American Sleep Disorders Association's 3-second definition [S3], and the arousal index was calculated according to the number of arousals per hour of sleep. Nocturnal oxygen desaturation was assessed by the minimum  $\text{SpO}_2$  during sleep and  $\text{SpO}_2 < 90\%$  time per total sleep time (TST) ( $\text{SpO}_2 < 90\%$ , %TST). OSA severity was defined by the AHI as follows: control ( $\text{AHI} < 15$ ), moderate OSA ( $15 \leq \text{AHI} < 30$ ), and severe OSA ( $\text{AHI} \geq 30$ ).

### **Measurements of plasma and urinary L-PGDS concentrations**

Concentrations of urinary or plasma L-PGDS were measured by an enzyme-linked immunosorbent assay (ELISA) using 2 monoclonal antibodies, Mab-7F5 and Mab-1B7, as described previously [S4-S7]

In brief, urine or serum (plasma) samples were diluted [urine: 1:100-800 (1 part urine sample plus 99-799 parts diluent), serum (plasma): 1:50-400 (1 part serum or plasma sample plus 49-399 parts diluent)] with Tris-buffered saline (20 mM Tris-HCl, pH 7.4, and 154 mM NaCl) containing 1 g/L bovine serum albumin and 0.1 g/L thimerosal and incubated at 25°C for 90 min in Costar 3590 microtiter plates (Corning, Corning, NY, USA) precoated with unlabelled Mab-7F5 (10 mg/L). After a wash, the plates were incubated at 25°C with peroxidase-conjugated Mab-1B7 for 90 min. Thereafter, the substrate solution containing 3,3', 5, 5'-tetramethylbenzidine (BM blue-POD substrate; Roche Diagnostics, Mannheim, Germany) was added to each well, and the reaction was stopped by adding 1 mol/L sulfuric acid (100 µL/well).

The plates were read using a Spectra-Max 250 microplate reader (Molecular Devices, Sunnyvale, CA, USA) at 450 nm. Recoveries of L-PGDS in urine samples and serum samples ranged from 91% to 111% and from 91% to 109%, respectively [S6, S7]. When serum samples containing 0.43, 0.98, and 1.15 mg/L were serially diluted and assayed, each sample gave results close to linearity ( $r=0.999-1.000$ ) [S7]. When urine samples containing 0.9, 2.7, and 4.7 mg/L L-PGDS were serially diluted and assayed, each sample gave results close to linearity ( $r$

=0.998–1.000), confirming parallelism between the calibrators and urine samples [S6]. With this ELISA system, it has been demonstrated that intra- and interassay coefficients of variation in urine samples ranged from 3.2% to 5.8% and from 7.6% to 8.3%, respectively [S6]. The intra- and interassay coefficients of variation in serum samples were 3.6% and 5.8%, respectively [S7]. All of the samples were measured in duplicate and the results were averaged.

**References (Supplementary material)**

- S1 Rechtschaffen A, Kales A. *A Manual of Standardized Terminology, Techniques and Scoring System for Sleep Stages of Human Subjects*. Washington, DC: National Institutes of Health, 1968.
- S2 Iber C, Ancoli-Israel S, Chesson A, Quan S. *The AASM Manual for the Scoring of Sleep and Associated Events: Rules, Terminology and Technical Specifications*. American Academy of Sleep Medicine, Westchester, IL, USA 2007.
- S3 EEG arousals: scoring rules and examples: a preliminary report from the Sleep Disorders Atlas Task Force of the American Sleep Disorders Association. *Sleep* 1992; 15:173-84.
- S4 Eguchi Y, Eguchi N, Oda H, Seiki K, Kijima Y, Matsu-ura Y, Urade Y, Hayaishi O. Expression of lipocalin-type prostaglandin D synthase (beta-trace) in human heart and its accumulation in the coronary circulation of angina patients. *Proc Natl Acad Sci U S A* 1997; 94:14689-94.
- S5 Oda H, Eguchi N, Urade Y. Quantitative sandwich enzyme-linked immunosorbent assay for human secretory prostaglandin D synthase ( $\beta$ -trace). *Proc Japan Acad* 1996; 72: 108-11.
- S6 Oda H, Shiina Y, Seiki K, Sato N, Eguchi N, Urade Y. Development and evaluation of a practical ELISA for human urinary lipocalin-type prostaglandin D synthase. *Clin Chem* 2002; 48:1445-53.

S7 Miwa Y, Oda H, Shiina Y, Shikata K, Tsushima M, Nakano S, Maruyama T, Kyotani S, Eguchi N, Urade Y, Takahashi-Yanaga F, Morimoto S, Sasaguri T. Association of serum lipocalin-type prostaglandin D synthase levels with subclinical atherosclerosis in untreated asymptomatic subjects. *Hypertens Res* 2008; 31:1931-9.
